# Supplementary material for: Shifting the scaling relations of single-atom catalysts for facile methane activation by tuning the coordination number
Source: Royal Society of Chemistry journal article supplement (doi:10.1039/d0sc05632d), 2021-01-01
Supplement: d0sc05632d1.pdf [file d0sc05632d1.pdf]

Supporting Information

**Shifting the scaling relations of single-atom catalysts for  
facile methane activation by tuning the coordination  
number**

Changhyeok Choi,<sup>a</sup> Sungho Yoon,<sup>b</sup> and Yousung Jung\*<sup>a</sup>

*<sup>a</sup>Department of Chemical and Biomolecular Engineering, Korea Advanced Institute of Science and Technology (KAIST), 291 Daehak-ro, Yuseong-gu, Daejeon 34141, Republic of Korea.*

*<sup>b</sup>Department of Chemistry, Chung-Ang University, Dongjak-Gu, Seoul 06974, Republic of Korea*

## Calculation details for zeolites and IrO<sub>2</sub>(110)

We considered [CuO]<sup>+</sup> and [Cu-O-Cu]<sup>2+</sup> cations embedded zeolites. The CHA and MOR framework were used to construct [CuO]<sup>+</sup> (CHA/Cu-O) and [Cu-O-Cu]<sup>2+</sup> (MOR/Cu-O-Cu), respectively. For both catalysts, 8MR channel was considered. We used stable structures of CHA/Cu-O<sup>1</sup> and MOR/Cu-O-Cu<sup>2</sup> which have been previously revealed in the literatures (**Figure S1**). For IrO<sub>2</sub>, a rutile (110) facet was used. A (2 x 2) supercell with 4 layers, while bottom two layers were fixed to their optimized bulk positions. We considered O adsorbed at CUS as an active site (**Figure S2**). For zeolites, the gamma point was used while a (4 x 4 x 1) k-point sampling was employed for IrO<sub>2</sub>(110).<sup>3</sup>

## Reaction rate for methane activation

We obtain the overall reaction rate for methane activation by using  $E_f$  and  $E_H$  as suggested by Nørskov and coworkers.<sup>4</sup>

$$rate = \vartheta_{motif} \frac{k_B T}{h} \exp\left(\frac{-\Delta G_a}{k_B T}\right)$$

$$\vartheta_{motif} = \frac{\sqrt{P_{O_2}} \exp\left(\frac{-G_f}{k_B T}\right)}{1 + \sqrt{P_{O_2}} \exp\left(\frac{-G_f}{k_B T}\right)}$$

The  $\vartheta_{motif}$  is the fraction of available \*O atoms for methane activation and the remaining terms represent the rate of methane activation at \*O atoms. Here, we consider  $P_{O_2} = 1$  bar and  $T = 150$  °C to simulate the low temperature methane activation. The  $\Delta G_a$  represents activation free energy of C-H bond cleavage of methane at active \*O atom (\*O + CH<sub>4</sub>(g) → \*OH + ·CH<sub>3</sub>(g)),

which is predicted by using the universal scaling relationship between  $E_a$  and  $E_H$  as below.<sup>4, 5</sup>

$$E_a = 0.75 E_H + 1.96 \text{ (eV)}$$

Consequently, we obtain a 2D-volcano plot of rate for methane activation by using the two descriptors ( $G_f$  and  $G_H$ ).

### Fractional degree of charge delocalization

To estimate the ability of charge delocalization of catalysts upon \*O formation, we compare the fractional degree of charge delocalization ( $\chi_{ox}$ ) as suggested by Snurr and coworkers.<sup>5</sup>

$$\chi_{ox} = 1 - \frac{\Delta q_M}{|q_O|}$$

$\Delta q_M$  is the change in partial charge of metal atom following the \*O formation and  $q_O$  is the partial charge on the \*O. To maintain the charge neutrality,  $|q_O|$  equals to the sum of  $\Delta q_M$  and change in charge of framework atoms ( $\Delta q_{\text{frame}}$ , all atoms except for metal and \*O). The  $\chi_{ox} = 0$  implies that \*O formation occurs without any charge delocalization ( $\Delta q_M = |q_O|$ ), while the  $\chi_{ox} = 1$  implies fully delocalized ( $\Delta q_M = 0$ ). The atomic charges are obtained by the Bader charge analysis.<sup>6</sup>

A wide range of  $\chi_{ox}$  values are obtained at each moiety, however, the relationship between  $\chi_{ox}$  and different scaling line was not observed. For example, the  $\chi_{ox}$  values of M@C<sub>4</sub> range almost evenly from 0.1 (poorly delocalized) to 0.9 (well delocalized) (**Figure S4c**). However, all M@C<sub>4</sub> catalysts fall on the same scaling line, different from the scaling line of M@C<sub>2</sub> or M@C<sub>3</sub> (**Figure S4d**).

## Formation energy of $M@N_xC_y$ catalysts

The formation energy of  $M@N_xC_y$  catalysts ( $E_{\text{form}}$ ) is obtained by the equation,

$$E_{\text{form}} = E(M@N_xC_y) - E(\text{graphene}) + l\mu(\text{C}) - m\mu(\text{N}) - \mu(\text{M}).$$

Here,  $l$  and  $m$  represent the number of carbon defects and nitrogen in the slab model,  $E$  is the electronic total energy, and  $\mu(\text{C})$ ,  $\mu(\text{N})$  and  $\mu(\text{M})$  are the chemical potential of carbon, nitrogen and metal defined as the electronic total energy per atom in pristine graphene,  $\text{N}_2(\text{g})$  and bulk metals (unit cell), respectively.

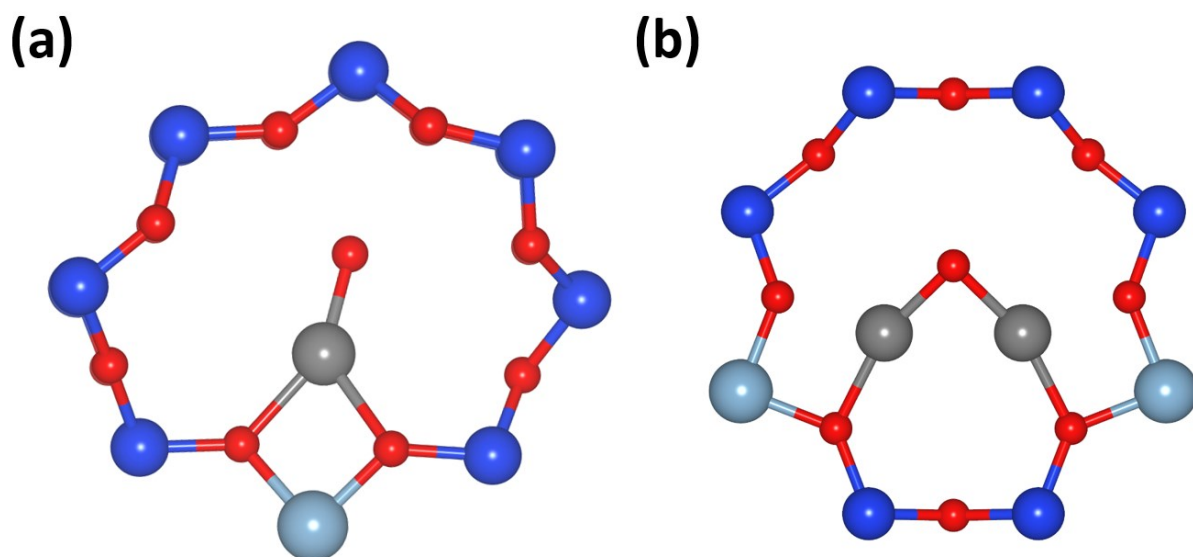

**Figure S1.** The optimized structures of (a) CHA/Cu-O and (b) MOR/Cu-O-Cu. Grey, sky blue, blue and red balls represent Cu, Al, Si and O atoms, respectively.

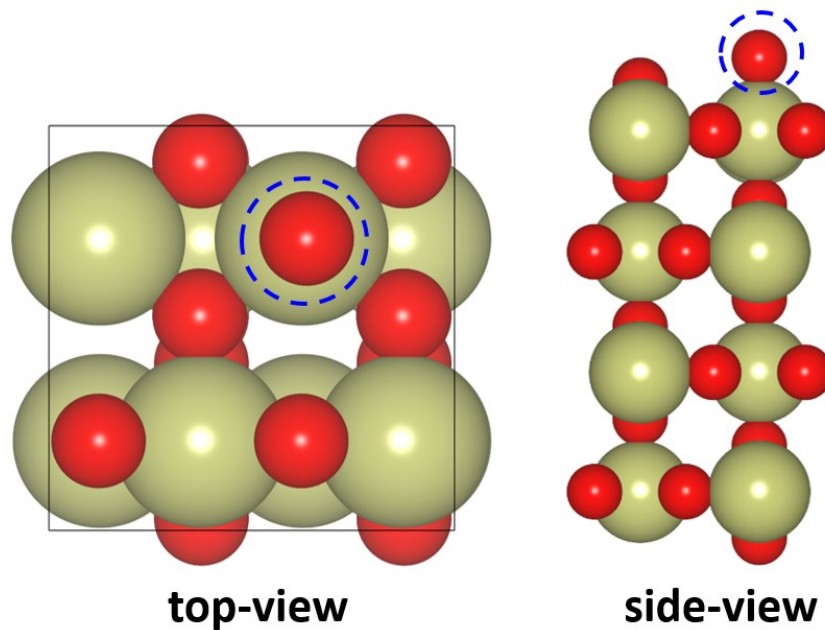

**Figure S2.** The optimized geometry for \*O on CUS in IrO<sub>2</sub>(110). Yellow and red balls represent Ir and O atoms, respectively. The reactive \*O is highlighted in blue circle.

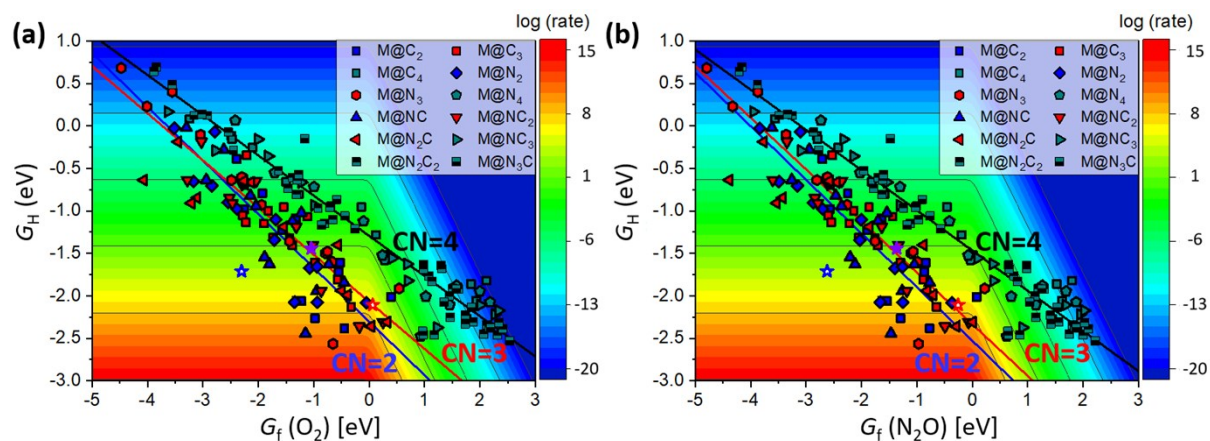

**Figure S3.** 2D-volcano plot for methane activation at 150 °C as a function of  $G_f$  and  $G_H$  obtained by using (a) O<sub>2</sub> and (b) N<sub>2</sub>O as an oxidant. When using N<sub>2</sub>O,  $G_f$  is obtained via the reaction of  $* + N_2O(g) \rightarrow *O + N_2(g)$ . Blue, red and black lines represent linear scaling lines of CN = 2, 3 and 4, respectively.

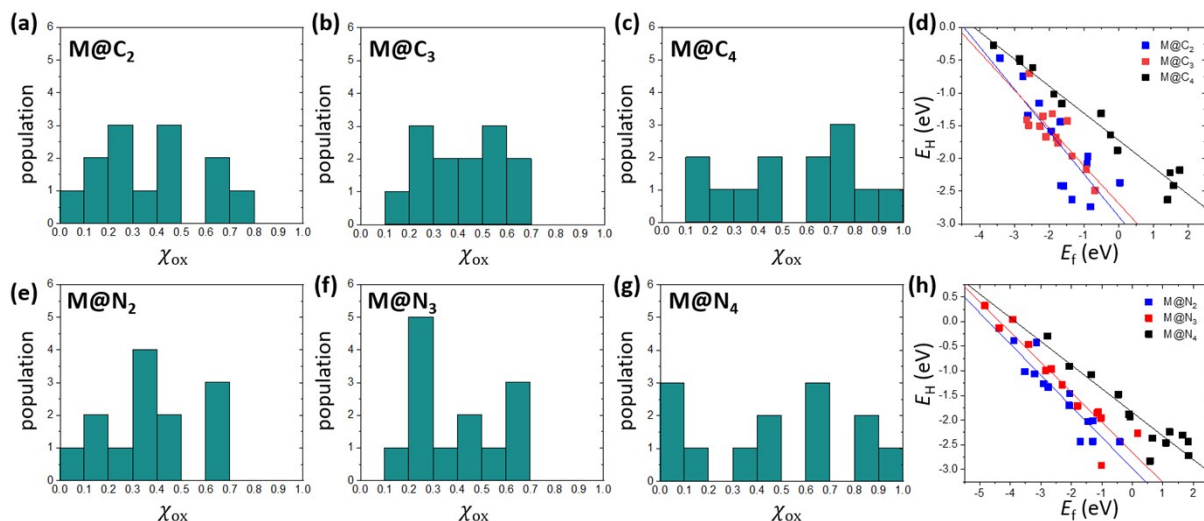

**Figure S4.** Distribution of  $\chi_{ox}$  in (a)  $M@C_2$ , (b)  $M@C_3$ , (c)  $M@C_4$ , (e)  $M@N_2$ , (f)  $M@N_3$  and (g)  $M@N_4$ . Scaling relationship between  $E_f$  vs.  $E_H$  on (d)  $M@C_x$  and (h)  $M@N_x$ . Blue, red and black represent CN = 2, 3 and 4, respectively.

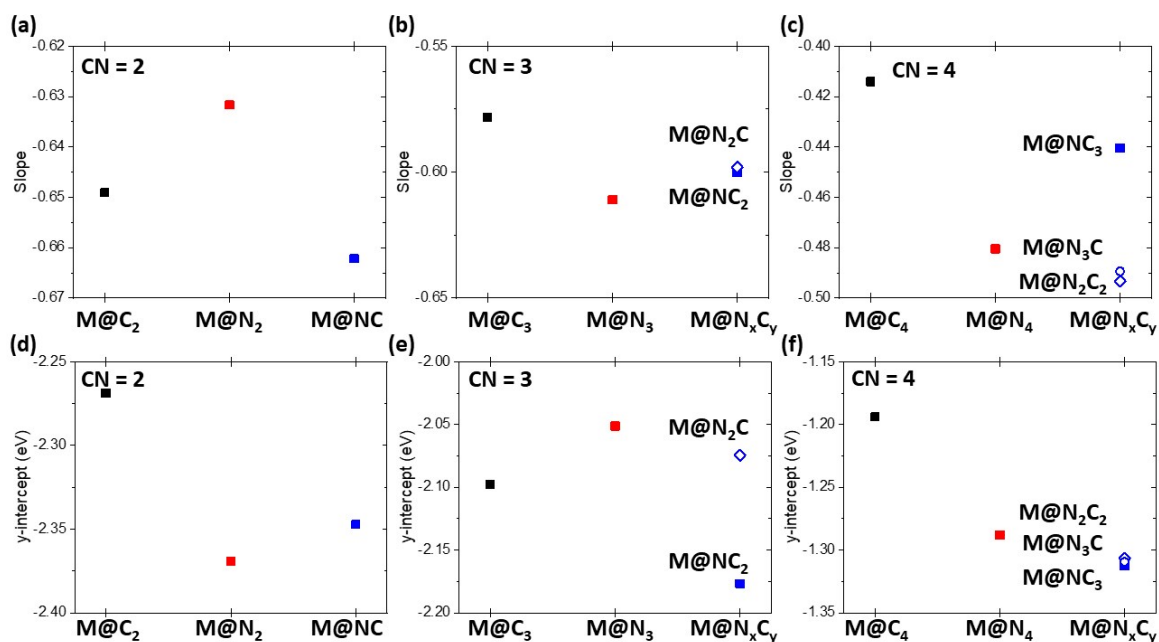

**Figure S5.** Change of slope by ligand atom when (a) CN = 2, (b) CN = 3 and (c) CN = 4. Change of y-intercept by ligand atom when (d) CN = 2, (e) CN = 3 and (f) CN = 4. Black, red and blue represent  $M@C_x$ ,  $M@N_x$  and  $M@N_xC_y$ , respectively.

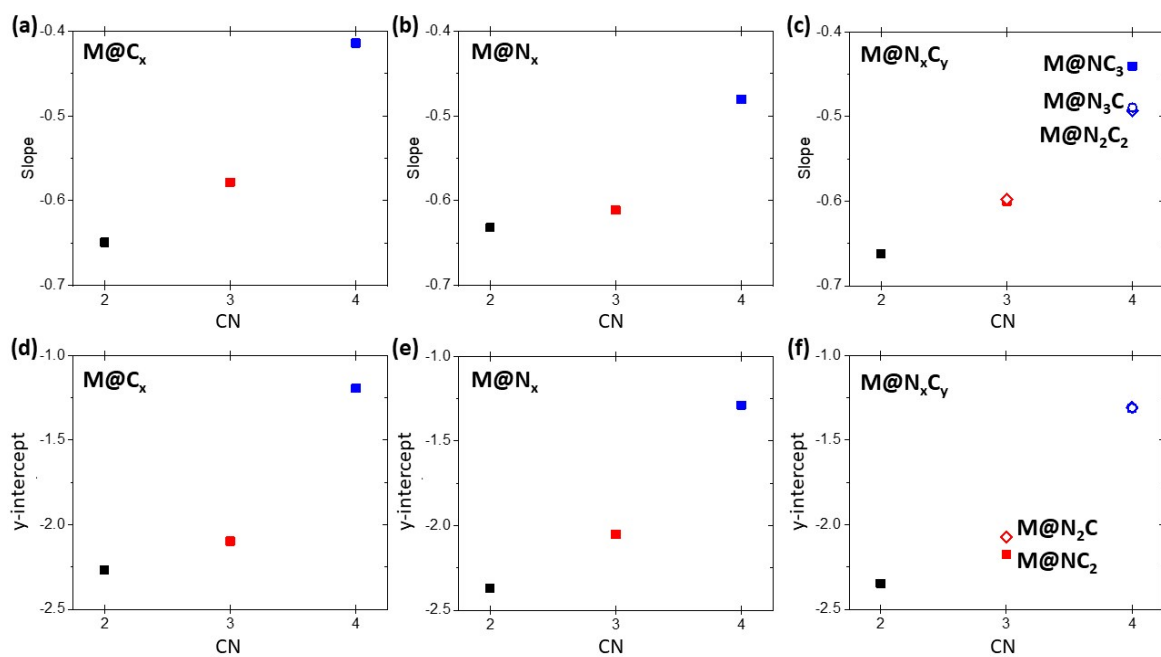

**Figure S6.** Change of slope by CN on (a)  $M@C_x$ , (b)  $M@N_x$  and (c)  $M@N_xC_y$ . Change of y-intercept by CN on (d)  $M@C_x$ , (e)  $M@N_x$  and (f)  $M@N_xC_y$ . Black, red and blue represent CN = 2, 3 and 4, respectively.

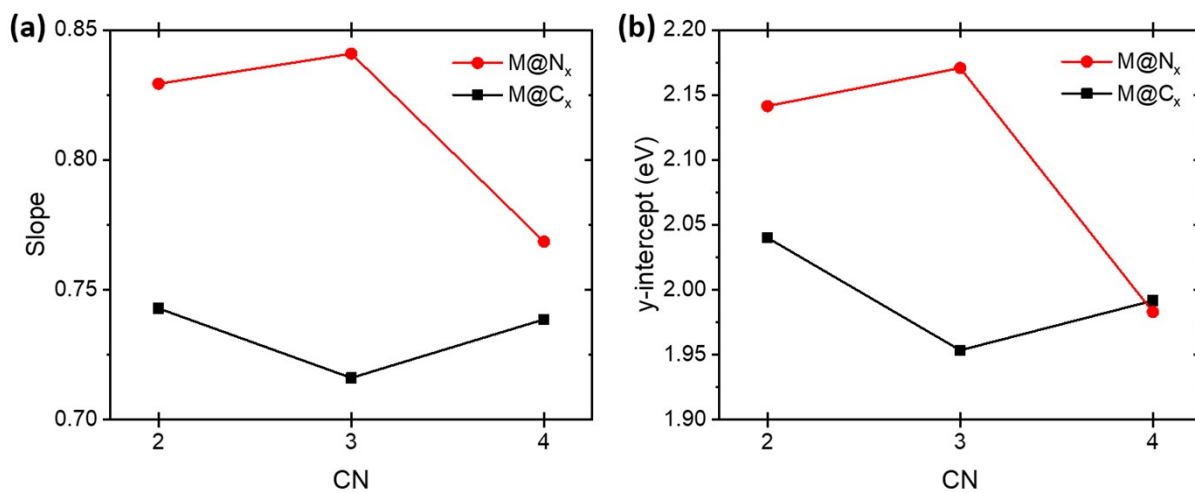

**Figure S7.** Slope and y-intercept of linear scaling line between  $E_H$  and  $E_a(\text{CH}_4)$ .

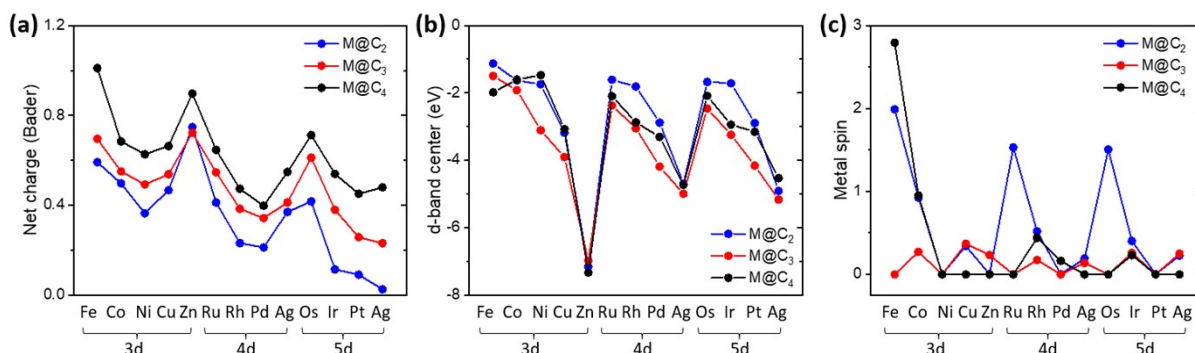

**Figure S8.** Changes of (a) net charge obtained by the Bader charge analysis, (b) d-band center and (c) spin momentum of metal in  $M@C_x$  catalysts with CN. Blue, red and black represent  $M@C_2$ ,  $M@C_3$  and  $M@C_4$ , respectively.

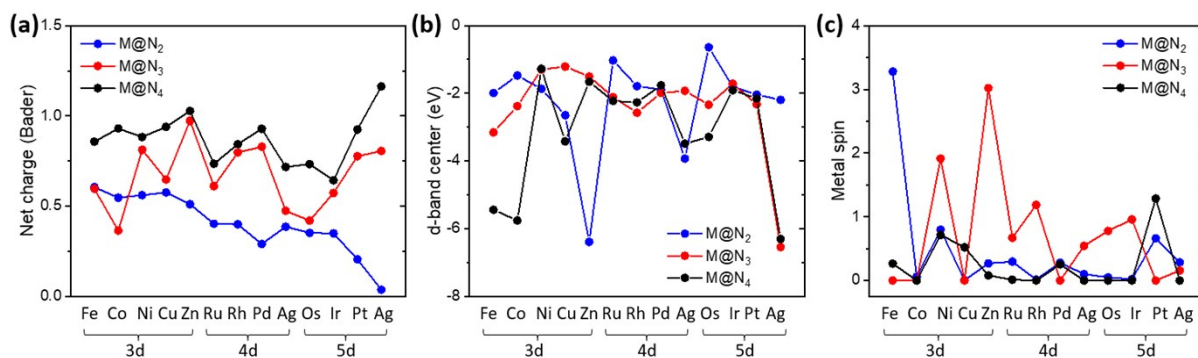

**Figure S9.** Changes of (a) net charge obtained by the Bader charge analysis, (b) d-band center and (c) spin momentum of metal in  $M@N_x$  catalysts with CN. Blue, red and black represent  $M@N_2$ ,  $M@N_3$  and  $M@N_4$ , respectively.



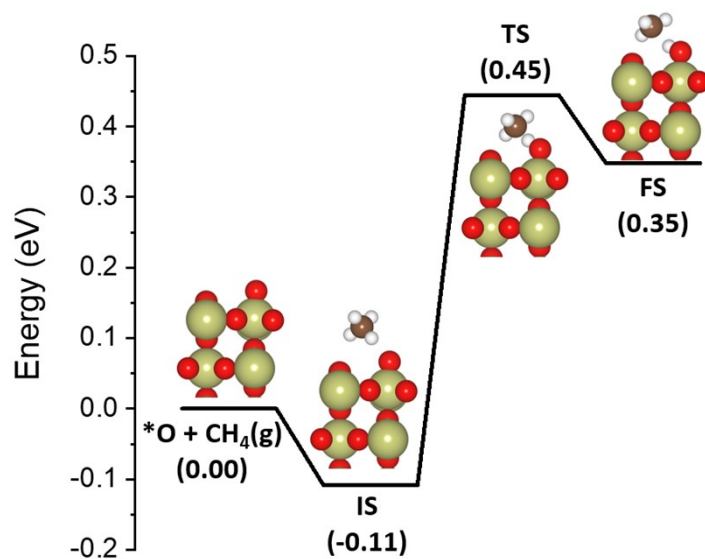

**Figure S10.** Free energy diagram for methane activation on IrO<sub>2</sub>(110). The CH<sub>4</sub>(g) and bottom two layers are omitted for the clarity. All energies are in eV.

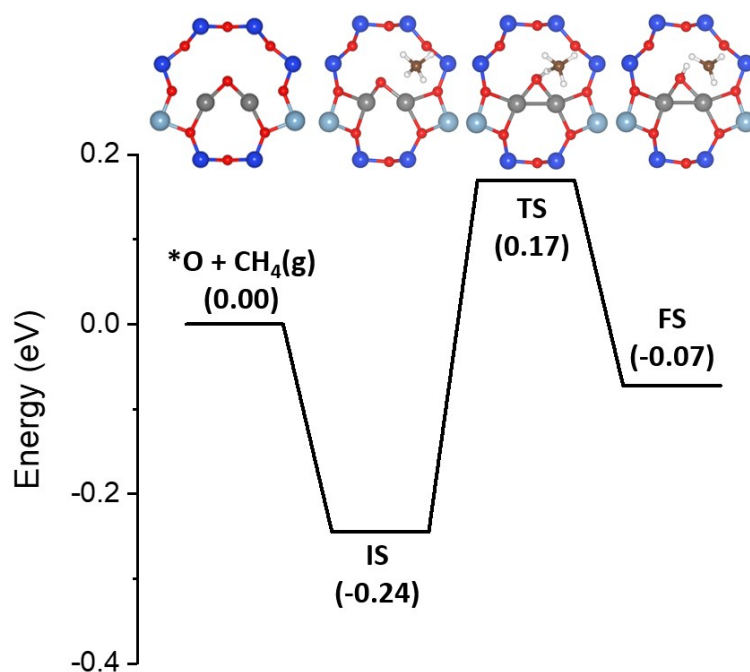

**Figure S11.** Free energy diagram for methane activation on MOR/Cu-O-Cu. All energies are in eV.

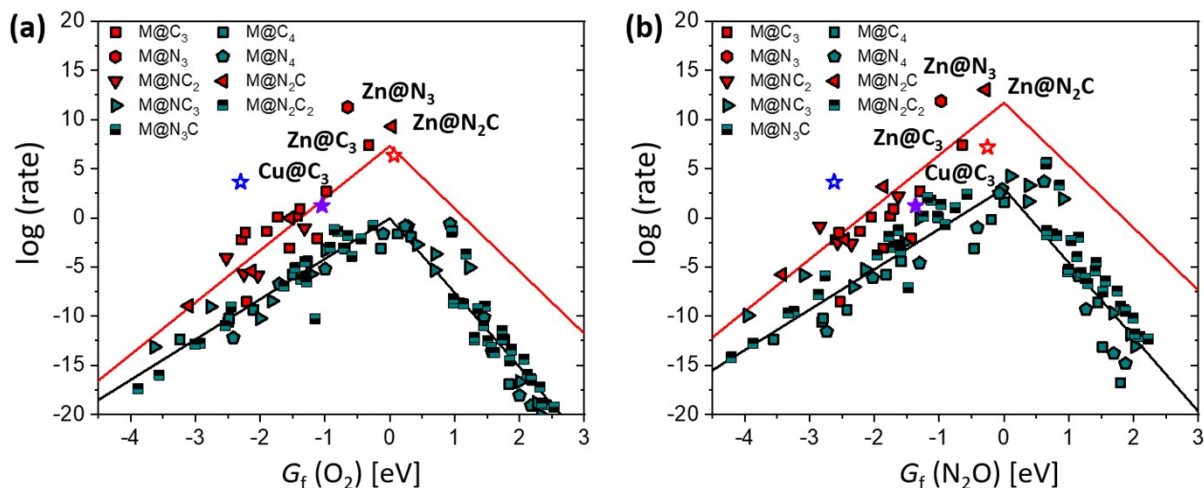

**Figure S12.** 1D-volcano plot for methane activation on stable  $M@N_xC_y$  catalysts obtained by using (a)  $O_2$  and (b)  $N_2O$  as an oxidant. Red and black lines represent scaling line in  $CN = 3$  and  $CN = 4$ , respectively

**Table S1.** Calculated  $E_a(CH_4)$  on  $M@N_x$  and  $M@C_x$  catalysts in eV.

| metal | $M@N_2$ | $M@N_3$ | $M@N_4$ | $M@C_2$ | $M@C_3$ | $M@C_4$ |
|-------|---------|---------|---------|---------|---------|---------|
| Ag    | 0.15    | 0.27    | 0.17    |         | 0.46    | 0.31    |
| Au    |         | 0.61    | -0.13   | 0.23    |         |         |
| Co    | 1.02    | 1.03    | 0.47    | 0.78    | 0.78    | 1.10    |
| Cu    | 0.43    | 0.49    | 0.13    | 0.09    | 0.57    | 0.36    |
| Fe    | 1.33    |         | 1.18    | 1.24    | 0.83    |         |
| Ir    |         |         | 0.85    |         | 1.02    |         |
| Ni    | 0.68    | 0.62    | 0.31    | 0.45    | 0.98    | 0.75    |
| Os    |         |         |         |         | 0.83    |         |
| Pd    | 0.51    | 0.60    | 0.03    | 0.25    | 0.91    | 0.61    |
| Pt    | 1.13    |         | 0.16    | 0.58    |         | 1.06    |
| Rh    | 0.88    | 1.50    |         | 0.84    | 0.84    |         |
| Ru    |         |         |         |         | 0.64    |         |
| Zn    | 0.12    | -0.22   | -0.13   | 0.35    | 0.12    | -0.04   |

**Table S2.** Binding energy of single metal atom ( $E_b$ ) at  $@C_x$  and  $@N_x$  defective sites relative to the bulk states (eV)

| Metal | $@C_2$ | $@C_3$ | $@C_4$ | $@N_2$ | $@N_3$ | $@N_4$ |
|-------|--------|--------|--------|--------|--------|--------|
| Fe    | 1.39   | -2.42  | -1.06  | 3.06   | 0.55   | -2.27  |
| Co    | 1.31   | -2.52  | -1.00  | 2.70   | 0.52   | -2.34  |
| Ni    | 0.48   | -1.95  | -1.33  | 2.20   | 0.62   | -2.62  |
| Cu    | 1.62   | 0.09   | -1.29  | 2.21   | 0.77   | -1.17  |
| Zn    | 1.68   | 0.06   | -1.35  | 1.57   | -0.16  | -2.15  |
| Ru    | 2.61   | -1.98  | -0.90  | 4.16   | 2.10   | -0.06  |
| Rh    | 1.51   | -2.34  | -0.88  | 3.03   | 2.04   | -1.29  |
| Pd    | 0.46   | -1.45  | -0.54  | 2.73   | 1.79   | -1.73  |
| Ag    | 2.11   | 1.00   | 0.15   | 2.33   | 1.11   | 0.69   |
| Os    | 3.86   | -1.01  | -0.41  | 5.65   | 3.77   | 0.85   |
| Ir    | 2.28   | -1.73  | -0.78  | 4.46   | 3.73   | -0.71  |
| Pt    | 0.61   | -1.49  | -1.34  | 3.81   | 3.16   | -1.80  |
| Au    | 1.93   | 0.81   | -1.12  | 3.02   | 2.23   | 0.22   |

**Table S3.** Binding energy of single metal atom ( $E_b$ ) at  $@N_xC_y$  defective sites relative to the bulk states (eV)

| Metal | $@NC$ | $@NC_2$ | $@N_2C$ | $@NC_3$ | $@N_2C_{2(1)}$ | $@N_2C_{2(2)}$ | $@N_2C_{2(3)}$ | $@N_3C$ |
|-------|-------|---------|---------|---------|----------------|----------------|----------------|---------|
| Fe    | 1.71  | -0.65   | -0.29   | -2.32   | -2.20          | -3.05          | -2.77          | -2.60   |
| Co    | 1.24  | -0.59   | -0.37   | -2.26   | -2.24          | -3.06          | -2.79          | -2.73   |
| Ni    | 1.12  | -0.20   | 0.10    | -2.85   | -3.01          | -3.77          | -3.42          | -3.27   |
| Cu    | 0.99  | 0.84    | 0.53    | -2.66   | -2.26          | -3.08          | -2.67          | -2.00   |
| Zn    | 0.68  | 0.53    | -0.55   | -1.98   | -1.43          | -2.34          | -2.53          | -2.14   |
| Ru    | 2.78  | 0.22    | 0.69    | -1.37   | -0.40          | -1.24          | -1.56          | -0.51   |
| Rh    | 1.36  | -0.17   | 0.65    | -1.80   | -2.36          | -1.99          | -2.06          | -1.60   |
| Pd    | 1.21  | 0.60    | 0.56    | -1.85   | -2.05          | -2.82          | -2.42          | -2.36   |
| Ag    | 1.94  | 1.56    | 1.18    | -1.24   | -0.86          | -1.74          | -1.31          | -0.67   |
| Os    | 4.11  | 1.35    | 2.16    | -0.76   | 0.33           | -0.58          | -0.79          | 0.28    |
| Ir    | 2.50  | 0.72    | 1.85    | -1.62   | -0.86          | -1.82          | -1.76          | -1.20   |
| Pt    | 1.71  | 1.02    | 1.49    | -2.43   | -2.36          | -3.20          | -2.71          | -2.51   |
| Au    | 1.94  | 1.71    | 1.38    | -2.29   | -1.70          | -2.67          | -2.18          | -1.44   |

**Table S4.**  $E_{\text{form}}$  of promising  $\text{M@N}_x\text{C}_y$  catalysts and experimentally synthesized  $\text{M@N}_x\text{C}_y$  catalysts. Asterisk (\*) denotes experimentally reported  $\text{M@N}_x\text{C}_y$  catalysts.

| Catalysts           | $E_{\text{form}}$ (eV) |
|---------------------|------------------------|
| Cu@C <sub>3</sub>   | 8.12                   |
| Zn@C <sub>3</sub>   | 8.09                   |
| Zn@N <sub>2</sub> C | 4.28                   |
| Zn@N <sub>3</sub>   | 3.18                   |
| *Ag@N <sub>4</sub>  | 4.40                   |
| *Ru@N <sub>4</sub>  | 3.65                   |
| *Co@N <sub>4</sub>  | 1.36                   |
| *Cu@N <sub>4</sub>  | 2.53                   |

## References

1. A. R. Kulkarni, Z.-J. Zhao, S. Siahrostami, J. K. Nørskov and F. Studt, *ACS Catal.*, 2016, **6**, 6531-6536.
2. M. H. Mahyuddin, T. Tanaka, Y. Shiota, A. Staykov and K. Yoshizawa, *ACS Catal.*, 2018, **8**, 1500-1509.
3. H. J. Monkhorst and J. D. Pack, *Phys. Rev. B*, 1976, **13**, 5188-5192.
4. A. A. Latimer, A. R. Kulkarni, H. Aljama, J. H. Montoya, J. S. Yoo, C. Tsai, F. Abild-Pedersen, F. Studt and J. K. Nørskov, *Nat. Mater.*, 2017, **16**, 225-229.
5. A. S. Rosen, J. M. Notestein and R. Q. Snurr, *ACS Catal.*, 2019, **9**, 3576-3587.
6. W. Tang, E. Sanville and G. Henkelman, *J. Phys.: Condens. Matter*, 2009, **21**, 084204.
